# Supplementary material for: A sensitive non-enzymatic electrochemical glucose sensor based on a ZnO/Co3O4/reduced graphene oxide nanocomposite
Source: Royal Society of Chemistry journal article supplement (doi:10.1039/d2sd00183g), 2022-12-23
Supplement: d2sd00183g1.pdf [file d2sd00183g1.pdf]

## Electronic Supplementary Information (ESI)

### A sensitive Non-Enzymatic Electrochemical Glucose Sensor based on ZnO/Co<sub>3</sub>O<sub>4</sub>/Reduced Graphene Oxide nanocomposite

Beshir A Hussein <sup>\*a</sup>, Abebaw A. Tsegaye<sup>b</sup>, Getabalew Shifera <sup>c</sup> and Abi M. Tadesse<sup>d</sup>

<sup>a</sup>Department of Chemistry, Mekdela Amba University, P.O.BOX 32 Mekansalam, Ethiopia.  
Email [beshir45@gmail.com](mailto:beshir45@gmail.com)

<sup>b</sup>Department of Chemistry, Bahir Dar University, P.O.BOX 79, Bahir Dar, Ethiopia

<sup>c</sup>Department of Chemistry, Mettu University, P.O.BOX 287 Mettu, Ethiopia

<sup>d</sup>Department of Chemistry, Haramaya University, P.O.BOX, 131 Dire Dawa, Ethiopia

Table S1. Absorbance, maximum wavelengths and band gaps of as synthesized sensors .

| Samples                                 | Absorbance | Maximum Wavelength (nm) | Band gap (E <sub>g</sub> ) (eV) |
|-----------------------------------------|------------|-------------------------|---------------------------------|
| Co <sub>3</sub> O <sub>4</sub>          | 1.83       | 358                     | 3.46                            |
| ZnO                                     | 2.25       | 378                     | 3.28                            |
| Co <sub>3</sub> O <sub>4</sub> /ZnO     | 2.27       | 406                     | 3.05                            |
| Co <sub>3</sub> O <sub>4</sub> /ZnO/rGO | 2.30       | 495                     | 2.50                            |

Table S2. Average crystallite size (D) of the as-synthesized nanoparticles

| Sample                                  | 2θ (Degree) | β (Radians) | D (nm) |
|-----------------------------------------|-------------|-------------|--------|
| Co <sub>3</sub> O <sub>4</sub>          | 37.31       | 0.003142    | 44.9   |
| ZnO NPs                                 | 36.27       | 0.008378    | 21.9   |
| ZnO/Co <sub>3</sub> O <sub>4</sub>      | 36.37       | 0.006981    | 25.2   |
| ZnO/Co <sub>3</sub> O <sub>4</sub> /rGO | 36.36       | 0.010123    | 17.5   |

Order of average crystallite size (D) of as-synthesized sensors is: Co<sub>3</sub>O<sub>4</sub> < ZnO/Co<sub>3</sub>O<sub>4</sub> < ZnO NPs < ZnO/Co<sub>3</sub>O<sub>4</sub>/rGO

Table S3. Summary of electrochemical Parameters of modified electrodes in 2mM of K<sub>3</sub>Fe(CN)<sub>6</sub> at a scan rate of 50 mV s<sup>-1</sup>

| Electrodes                     | i <sub>pa</sub> (μA) | E <sub>pa</sub> (mV) | i <sub>pc</sub> (μA) | E <sub>pc</sub> (mv) | i <sub>pa</sub> /i <sub>pc</sub> (A) | ΔE <sub>p</sub> (mv) | E <sub>o</sub> (mV) |
|--------------------------------|----------------------|----------------------|----------------------|----------------------|--------------------------------------|----------------------|---------------------|
| Bare GCE                       | 6.08                 | 250.93               | -6.5                 | 160.23               | 0.935                                | 90.7                 | 220.58              |
| Co <sub>3</sub> O <sub>4</sub> | 10.67                | 255.4                | -11.6                | 167.8                | 0.920                                | 87.6                 | 216.55              |

|                                         |       |        |        |       |       |       |         |
|-----------------------------------------|-------|--------|--------|-------|-------|-------|---------|
| ZnO                                     | 15.63 | 262.99 | -16.6  | 170.8 | 0.942 | 92.19 | 223.89  |
| ZnO/Co <sub>3</sub> O <sub>4</sub>      | 21.4  | 265.29 | -20.96 | 177.7 | 1.021 | 87.59 | 216.545 |
| ZnO/Co <sub>3</sub> O <sub>4</sub> /rGO | 24.6  | 270.34 | -24.56 | 184.8 | 1.002 | 85.54 | 220.34  |

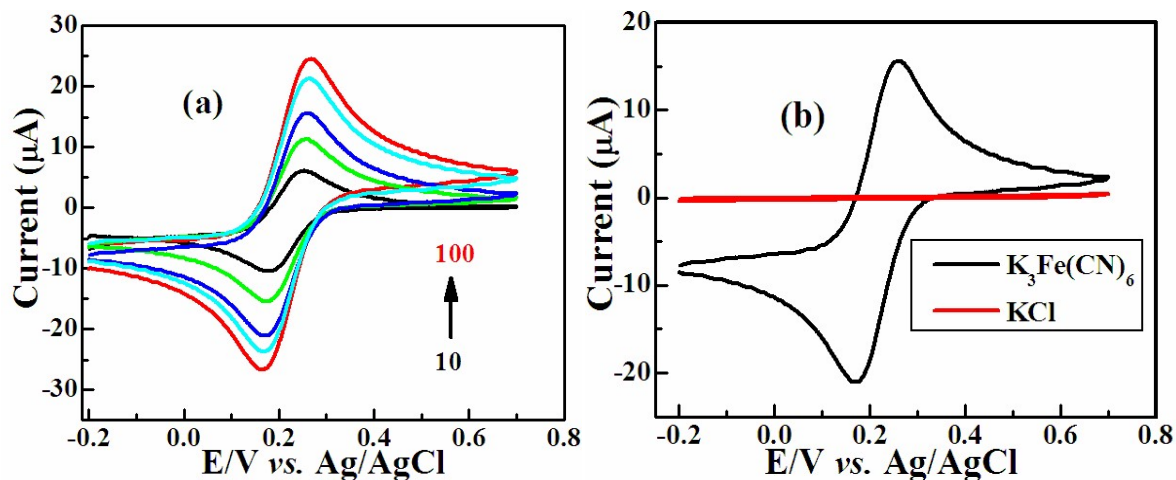

Figure S1. Cyclic Voltammograms of (a) 2mM  $K_3Fe(CN)_6$  in 0.1 M KCl on glassy carbon electrode at scan rates 10, 25, 50, 75 and 100  $mVs^{-1}$ , (b) CV of supporting electrolyte 0.1 M KCl and 2 mM  $K_3[Fe(CN)_6]/0.1M$  KCl at scan rate of 50  $mVs^{-1}$ .

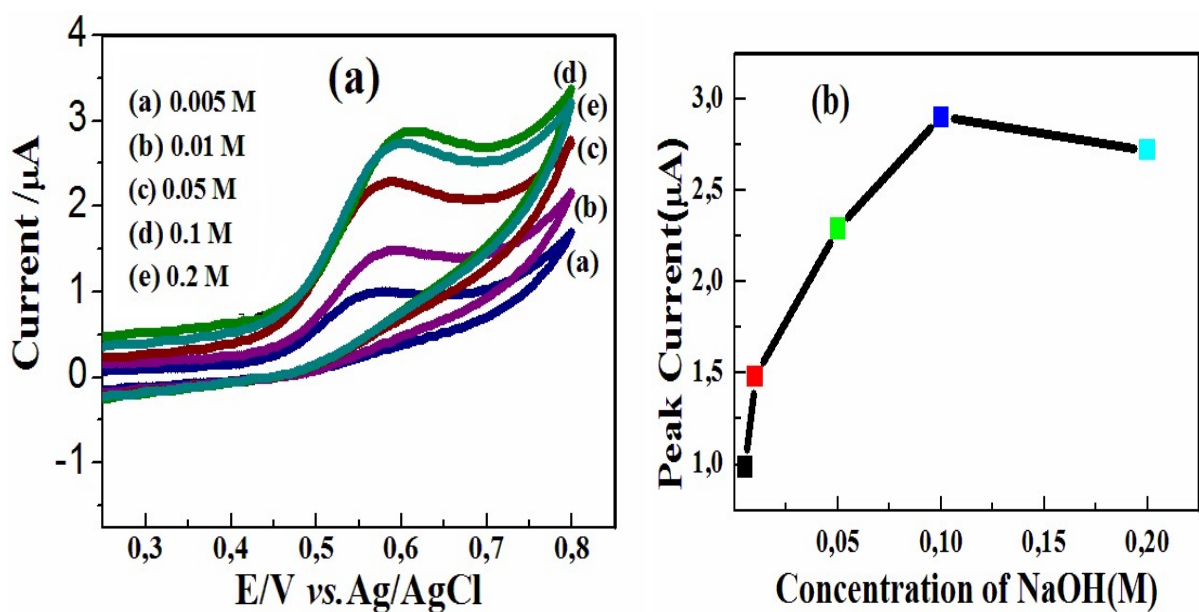

Figure. S2 Anodic current of ZnO/Co<sub>3</sub>O<sub>4</sub>/GCE (a) at different concentration of NaOH (0.005M up to 0.2M) upon addition of 2 mM glucose at scan rate of 50  $mVs^{-1}$  (b) the plot of peak current versus respective concentration of NaOH.

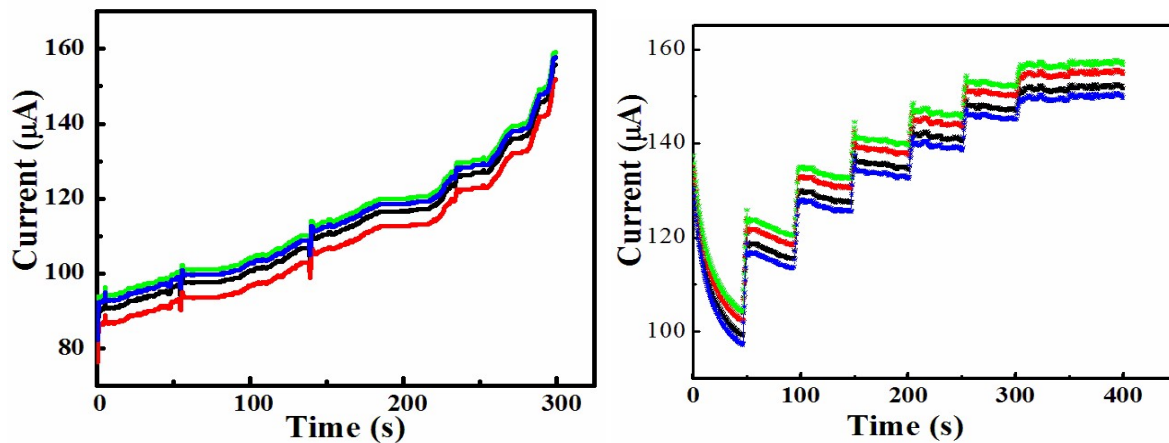

Figure S3. Current –time graph of (A) the repeatability four different measurement of a same sensor by injection of 0.5 mM glucose in 100 s interval (B) the reproducibility of the sensor by injection of 2mM glucose at 50 s interval.

Table S4. Repeatability and reproducibility of the ZnO/Co<sub>3</sub>O<sub>4</sub>/rGO nanocomposite sensor

| 2 mM glucose | Response current (μA) |
|--------------|-----------------------|
| 1            | 109.86                |
| 2            | 105.86                |
| 3            | 113.238               |
| 4            | 111.86                |
| Mean         | 110.2045              |
| RSD          | 2.91%                 |

| Sensor | Response current (μA) |
|--------|-----------------------|
| 1      | 149.54                |
| 2      | 154.58                |
| 3      | 158.58                |
| 4      | 147.58                |
| Mean   | 152.57                |
| RSD    | 3.26%                 |

Table S5. The current response of different concentration of glucose using ZnO/Co<sub>3</sub>O<sub>4</sub> /rGO electrode

| Concentration (mM) | Response current ( $\mu A$ ) |
|--------------------|------------------------------|
| 0.0001             | 10                           |
| 0.05               | 15                           |
| 0.01               | 21                           |
| 0.1                | 36                           |
| 0.5                | 85                           |
| 0.8                | 120                          |
| 1.5                | 175                          |
| 3                  | 290                          |
| 6                  | 530                          |
| 10                 | 890                          |
